# Supplementary material for: Functionalized nanozyme with drug loading for enhanced tumour combination treatment of catalytic therapy and chemotherapy
Source: Royal Society of Chemistry journal article supplement (doi:10.1039/d3tb01002c), 2023-01-01
Supplement: d3tb01002c1.pdf [file d3tb01002c1.pdf]

*Supporting Information*

# Functionalized nanozyme with drug loading for enhanced tumor combination treatment of catalytic therapy and chemotherapy

Qian Song,<sup>‡a</sup> Bin Chi,<sup>‡b</sup> Haiqing Gao,<sup>‡a</sup> Junke Wang,<sup>a</sup> Miaomiao Wu,<sup>c</sup> Yi Xu,<sup>a</sup> Yingxi Wang,<sup>a</sup>

Zushun Xu,<sup>a</sup> Ling Li,<sup>\*a</sup> Jing Wang,<sup>\*b</sup> Run Zhang<sup>\*c</sup>

<sup>a</sup> Ministry-of-Education Key Laboratory for the Synthesis and Application of Organic Function Molecules, Hubei Collaborative Innovation Center for Advanced Organic Chemical Materials, Hubei University, Wuhan 430062, China. Email: [lingli@hubu.edu.cn](mailto:lingli@hubu.edu.cn)

<sup>b</sup> Department of Radiology, Union Hospital, Tongji Medical College, Huazhong University of Science and Technology, Wuhan 430022, China. Email: [jjwinflower@126.com](mailto:jjwinflower@126.com)

<sup>c</sup> Australian Institute for Bioengineering and Nanotechnology (AIBN), The University of Queensland, St Lucia, QLD 4072, Australia. Email: [r.zhang@uq.edu.au](mailto:r.zhang@uq.edu.au)

<sup>‡</sup> These authors contributed equally to this work.

## Chemodynamic performance

To clarify the catalytic activity of Zr/Ce-MOFs and Zr/Ce-MOFs/DOX/MnO<sub>2</sub>, MB was applied as an indicator to monitor ·OH production. MB can be degraded by ·OH produced from the disproportionation reaction between H<sub>2</sub>O<sub>2</sub> and Zr/Ce-MOFs and Zr/Ce-MOFs/DOX/MnO<sub>2</sub>, then assayed at 665 nm on a UV spectrometer. According to the time-dependent absorbance curve, all the corresponding average initial velocities of absorbance were calculated. Next, these average initial velocities were transformed to initial velocities (V<sub>0</sub>) of ·OH production via the Beer-Lambert law (eqn (1)), and then plotted as curves against the corresponding concentrations and fitted by the Michaelis-Menten equation (eqn (3)) to obtain the Michaelis-Menten constant (K<sub>M</sub>) and the maximum velocity (V<sub>max</sub>).

$$A=kb c \quad (1)$$

$$V_0=(V_{\max} \times [S]) / (K_M + [S]) \quad (2)$$

$$1/V_0=(K_M/V_{\max}) \times (1/[S]) + (1/V_{\max}) \quad (3)$$

[S]-the concentration of H<sub>2</sub>O<sub>2</sub>

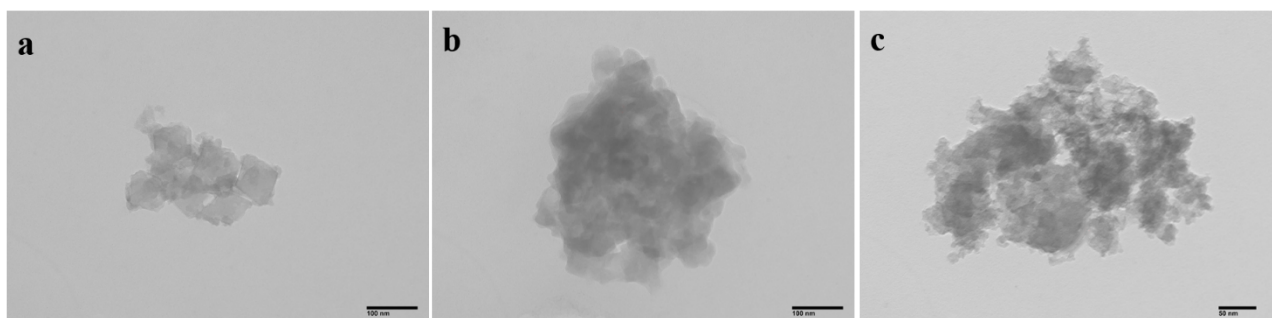

**Fig. S1.** TEM images of (a) Zr/Ce-MOFs, (b) Zr/Ce-MOFs/DOX and (c) Zr/Ce-MOFs/DOX/MnO<sub>2</sub>.

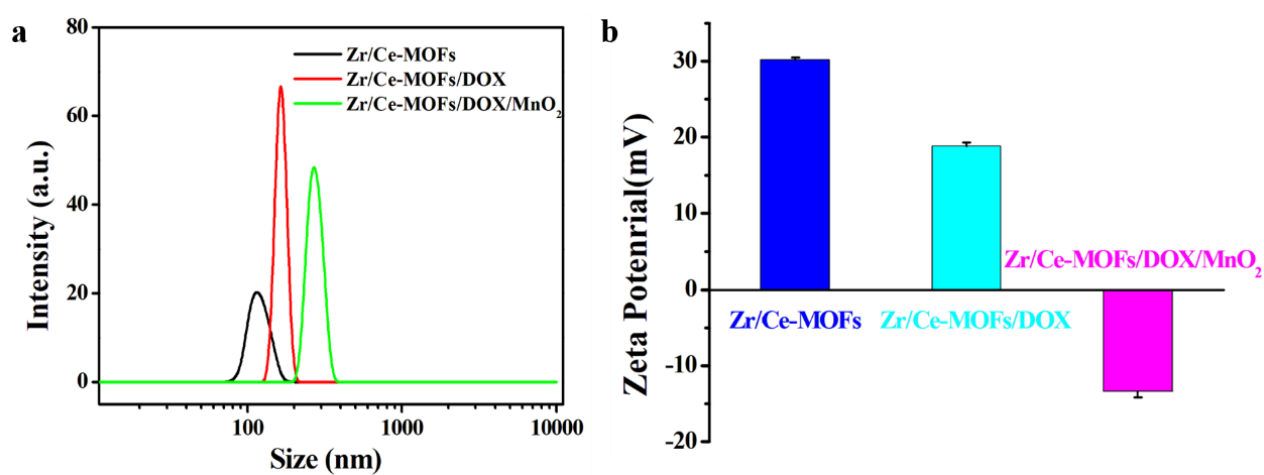

**Fig. S2.** (a) DLS and (b) Zeta potential of Zr/Ce-MOFs, Zr/Ce-MOFs/DOX and Zr/Ce-MOFs/DOX/MnO<sub>2</sub>. The error bar is the standard deviation of experimental data for three times.

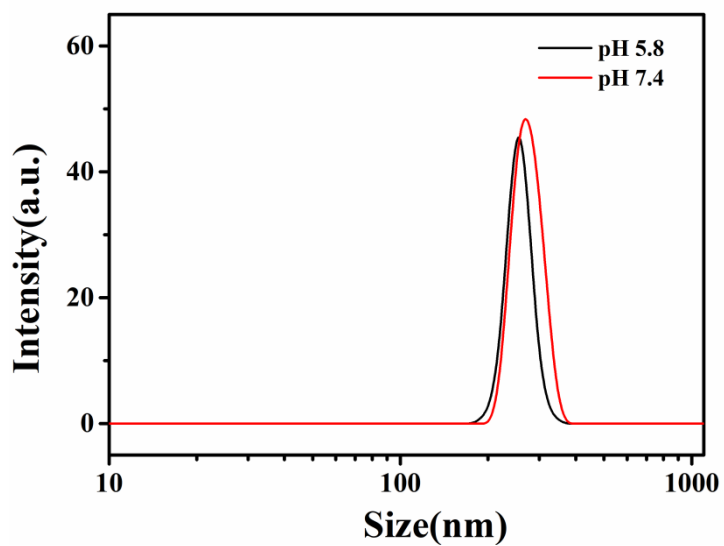

**Figure S3.** DLS size distribution of Zr/Ce-MOFs/DOX/MnO<sub>2</sub> in PBS of different pH.

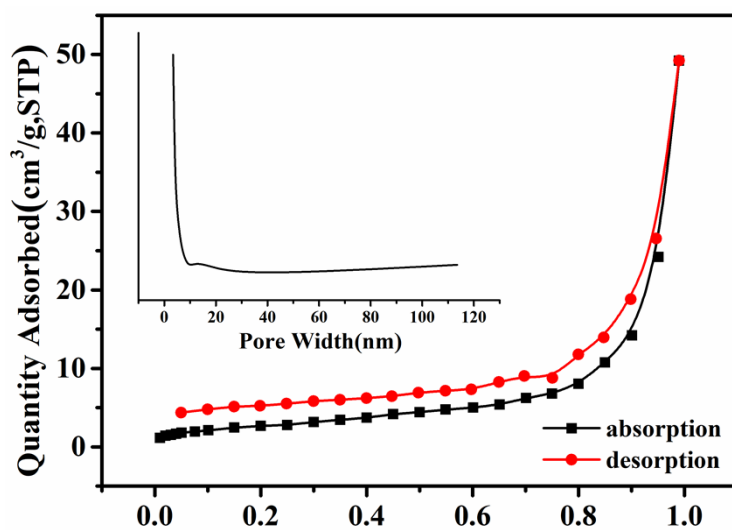

**Figure S4.** Nitrogen adsorption curve of Zr/Ce-MOFs.

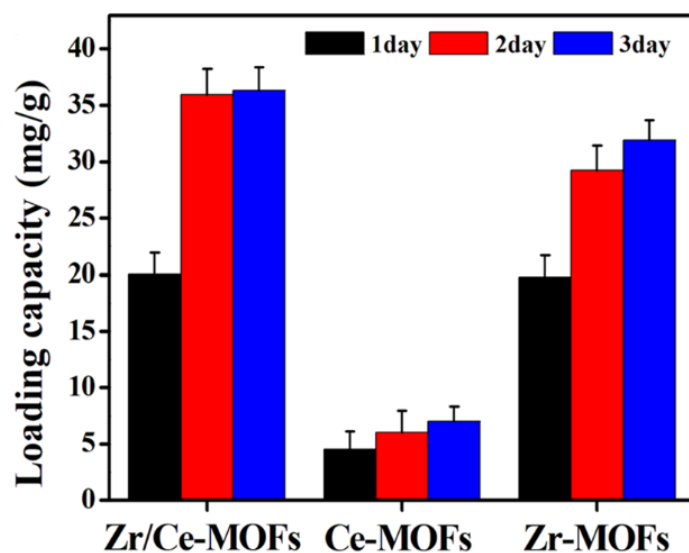

**Fig. S5.** The drug loading of different particle. The error bar is the standard deviation of experimental data for three times.

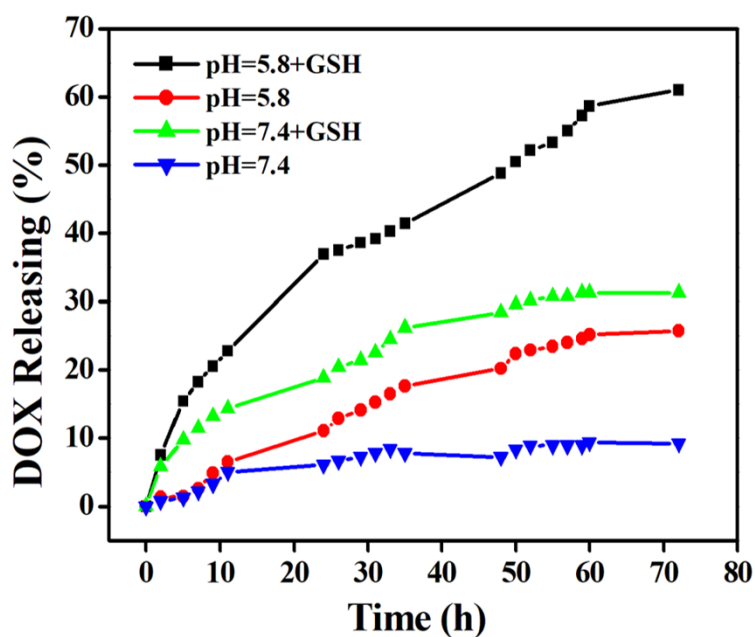

**Fig. S6.** The drug release of Zr/Ce-MOFs/DOX/MnO<sub>2</sub> at different pH values (pH = 7.4 and 5.8) and GSH concentrations (0 and 10 mM).

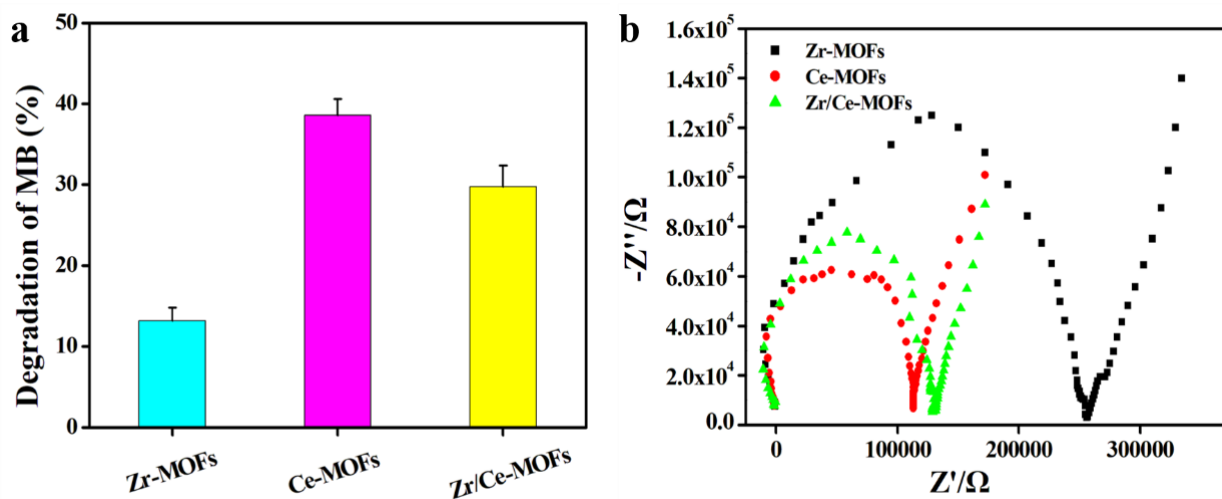

**Fig. S7.** (a) The degradation rate of MB of different materials; (b) EIS Nyquist plots of different materials. The error bar is the standard deviation of experimental data for three times.

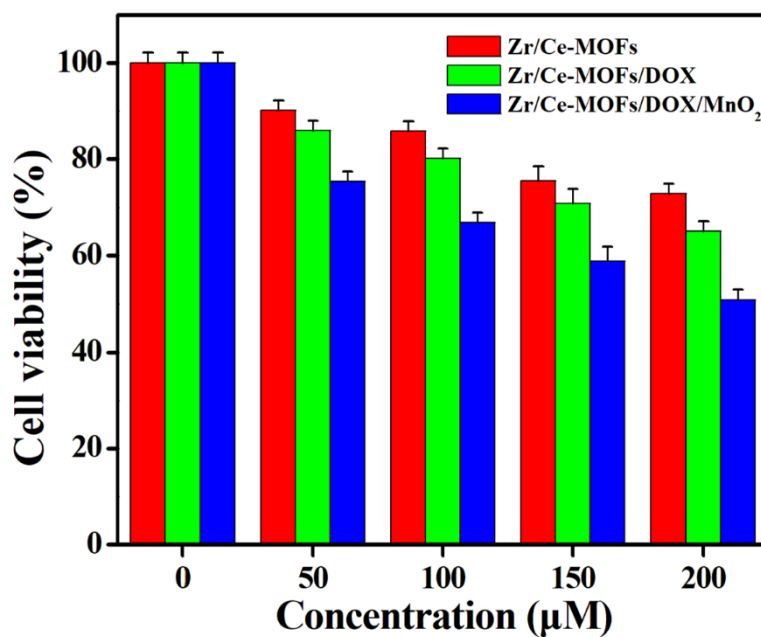

**Fig. S8.** Cell viability of Zr/Ce-MOFs, Zr/Ce-MOFs/DOX and Zr/Ce-MOFs/DOX/MnO<sub>2</sub>. The error bar is the standard deviation of experimental data for three times.

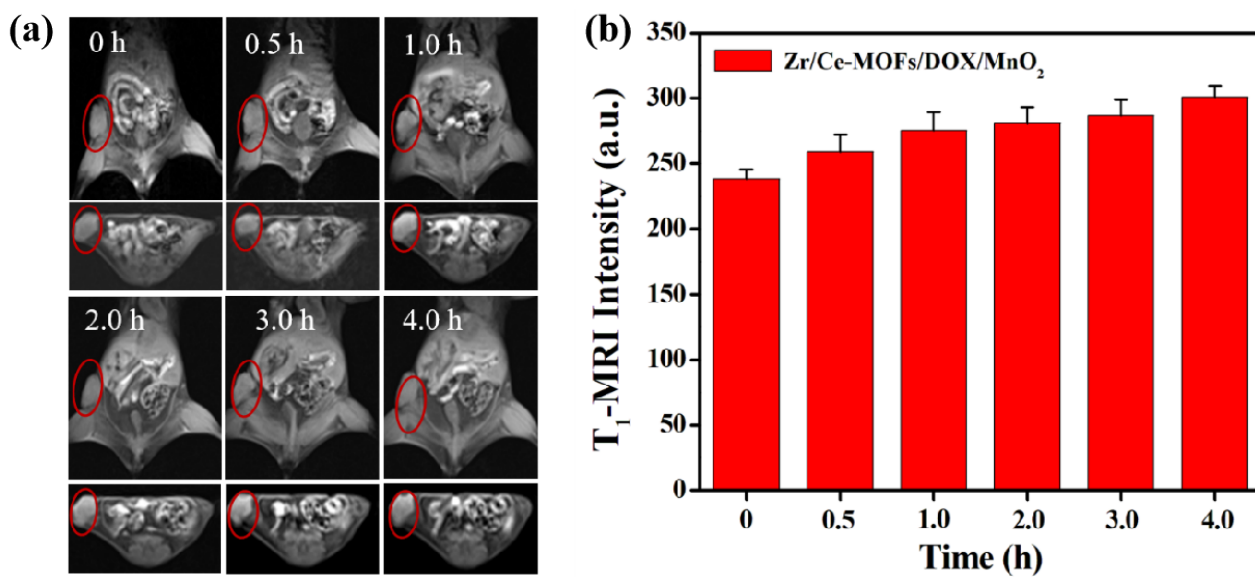

**Fig. S9.** (a) T<sub>1</sub>-weighted images of tumor after injection with Zr/Ce-MOFs/DOX/MnO<sub>2</sub> at different time points; (b) The MRI signal at the injection site. The error bar is the standard deviation of experimental data for three times.
